# Supplementary material for: Tailoring lattice chlorine in perovskite through dual-additive engineering for enhanced photovoltaic performance
Source: Royal Society of Chemistry journal article supplement (doi:10.1039/d4ta05811a), 2024-10-18
Supplement: d4ta05811a1.pdf [file d4ta05811a1.pdf]

# **Tailoring Lattice Chlorine in Perovskite through Dual-Additive Engineering for Enhanced Photovoltaic Performance**

Dun Ma, Jingwen He, Jie Sheng, Wu Shao, Zhihao Deng, Ronghao Cen,  
Yufei Fu, Wenjun Wu\*

Key Laboratory for Advanced Materials and Institute of Fine Chemicals Shanghai, Key Laboratory of Functional Materials, Chemistry School of Chemistry and Molecular Engineering, East China University of Science and Technology, Shanghai, 200237, China

E-mail: [wjwu@ecust.edu.cn](mailto:wjwu@ecust.edu.cn)

Table S1: Ion chromatographic raw data and its Cl<sup>-</sup> content calculation

|           | FTO+        |                    |                    |              |                         |                        |
|-----------|-------------|--------------------|--------------------|--------------|-------------------------|------------------------|
|           | FTO<br>(mg) | Perovskite<br>(mg) | Perovskite<br>(mg) | IC<br>(mg/L) | Cl <sup>-</sup><br>(mg) | Cl <sup>-</sup><br>(%) |
| 40% MACl  | 814.40      | 815.30             | 0.90               | 1.14         | 0.03                    | 3.17                   |
| 20% MACl  | 814.70      | 815.60             | 0.90               | 0.56         | 0.01                    | 1.56                   |
| 20% DMACl | 818.90      | 819.80             | 0.90               | 0.39         | 0.01                    | 1.08                   |
| Hybrid    | 820.60      | 821.40             | 0.80               | 0.34         | 0.01                    | 1.06                   |

Table S2: Perovskite lattice spacing calculation

|           | TiO <sub>2</sub> |      | ZrO <sub>2</sub> |      |
|-----------|------------------|------|------------------|------|
|           | 2θ/°             | d/Å  | 2θ/°             | d/Å  |
| Control   | 14.09            | 1.12 | 14.12            | 1.10 |
| 40% MACl  | 14.12            | 1.10 | 14.13            | 1.09 |
| 20% MACl  | 14.12            | 1.10 | 14.11            | 1.10 |
| 20% DMACl | 14.02            | 1.16 | 14.02            | 1.16 |
| Hybrid    | 14.07            | 1.13 | 14.06            | 1.13 |

Table S3: TRPL lifetime fitting calculations

|           | A <sub>1</sub> | τ <sub>1</sub> /ns | A <sub>2</sub> | τ <sub>2</sub> /ns | τ <sub>ave</sub> /ns |
|-----------|----------------|--------------------|----------------|--------------------|----------------------|
| Control   | 4573.38        | 4.44               | 0.71           | 106.63             | 4.82                 |
| 40% MACl  | 165.91         | 7.48               | 0.29           | 126.10             | 10.86                |
| 20% MACl  | 88.26          | 8.27               | 0.35           | 118.69             | 14.19                |
| 20% DMACl | 1780.86        | 5.08               | 0.23           | 170.96             | 5.79                 |
| Hybrid    | 6509.35        | 4.35               | 0.24           | 164.18             | 4.57                 |

Table S4: Carrier mobility and diffusion length

|           | Mobility (10 <sup>-6</sup> m <sup>2</sup> Vs) | Diffusion length (nm) |
|-----------|-----------------------------------------------|-----------------------|
| Control   | 1.21                                          | 12.29                 |
| 40% MACl  | 0.95                                          | 11.97                 |
| 20% MACl  | 1.06                                          | 16.70                 |
| 20% DMACl | 1.10                                          | 17.52                 |
| Hybrid    | 1.42                                          | 23.07                 |

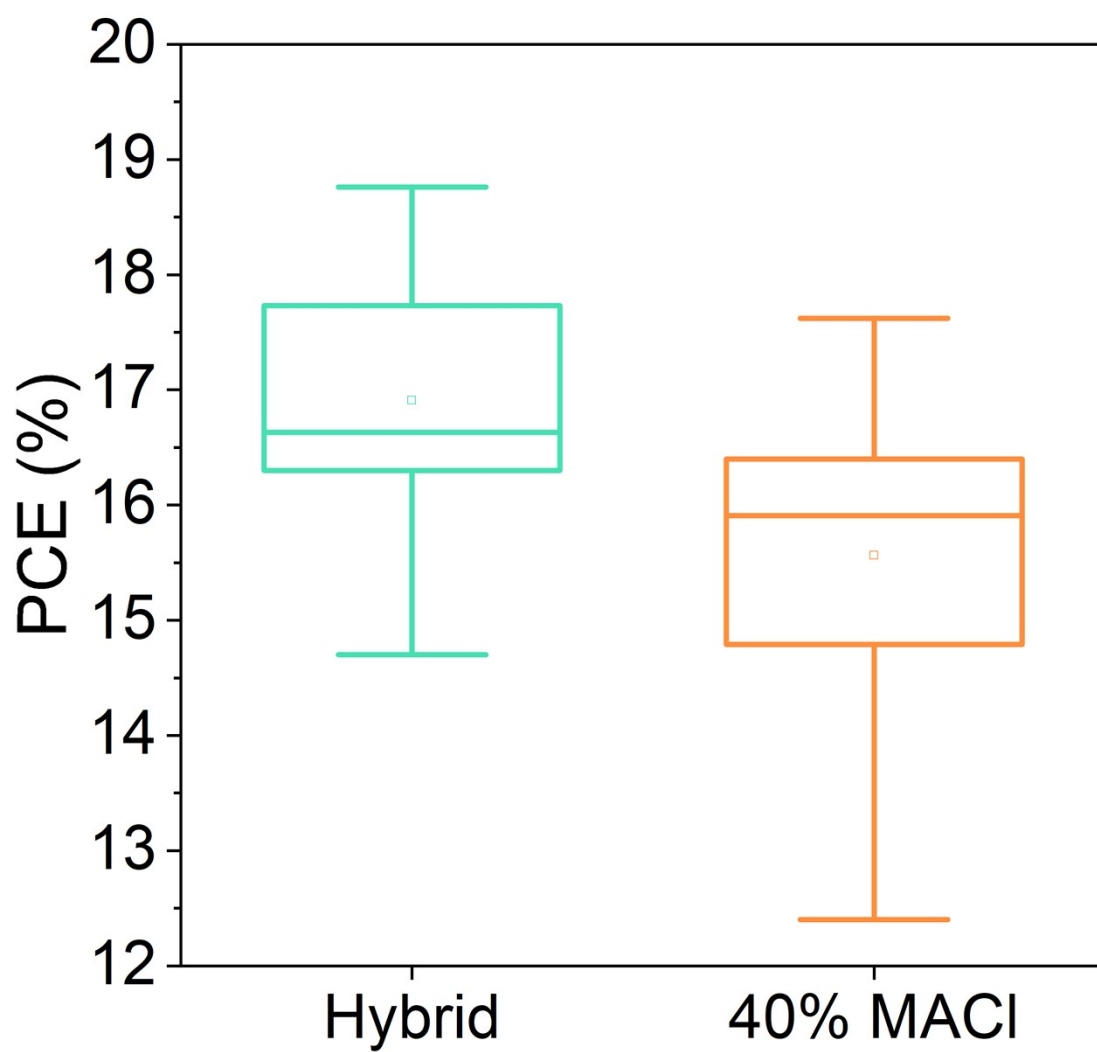

Figure S1: Distribution of photoelectric conversion efficiency for Hybrid and 40% MACl groups

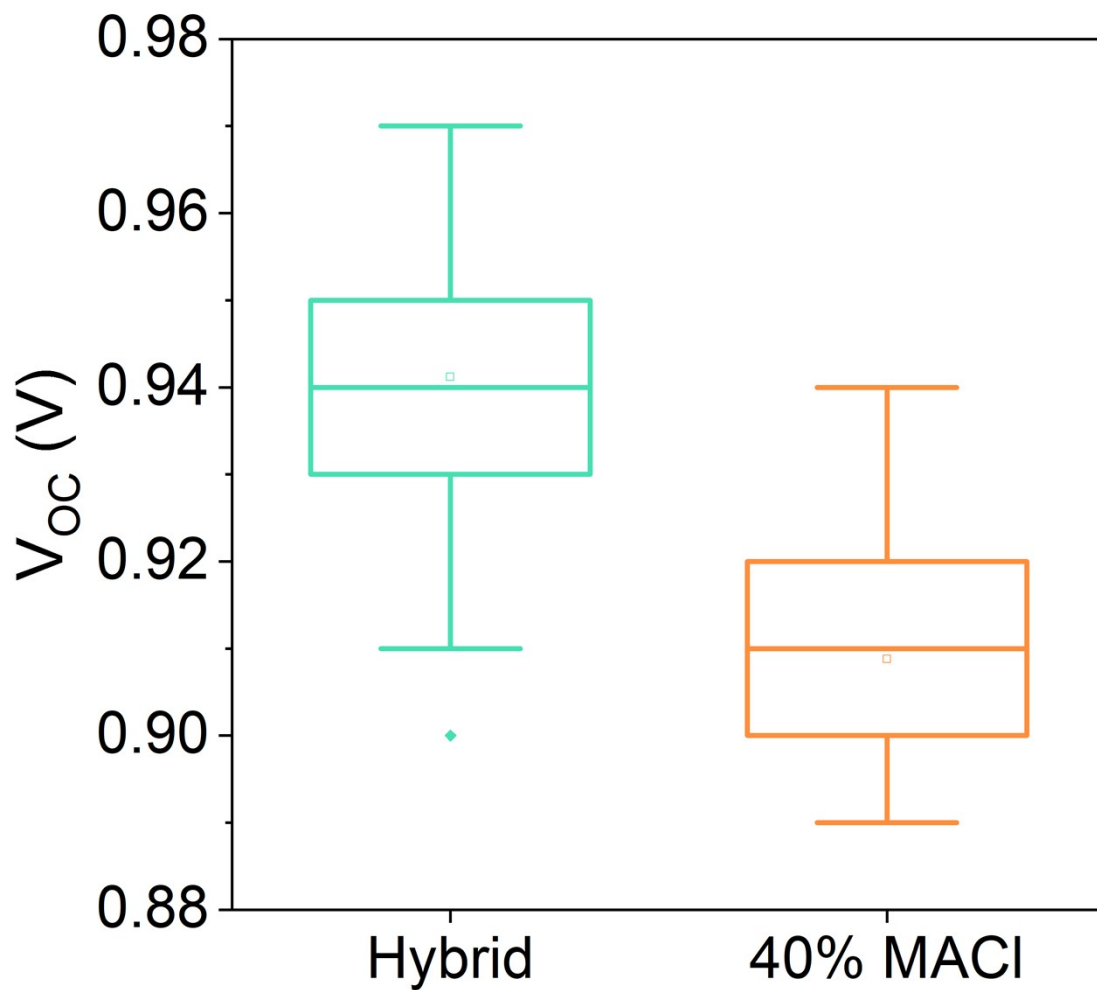

Figure S2: Open-circuit voltage distribution for Hybrid and 40 per cent MACl groups

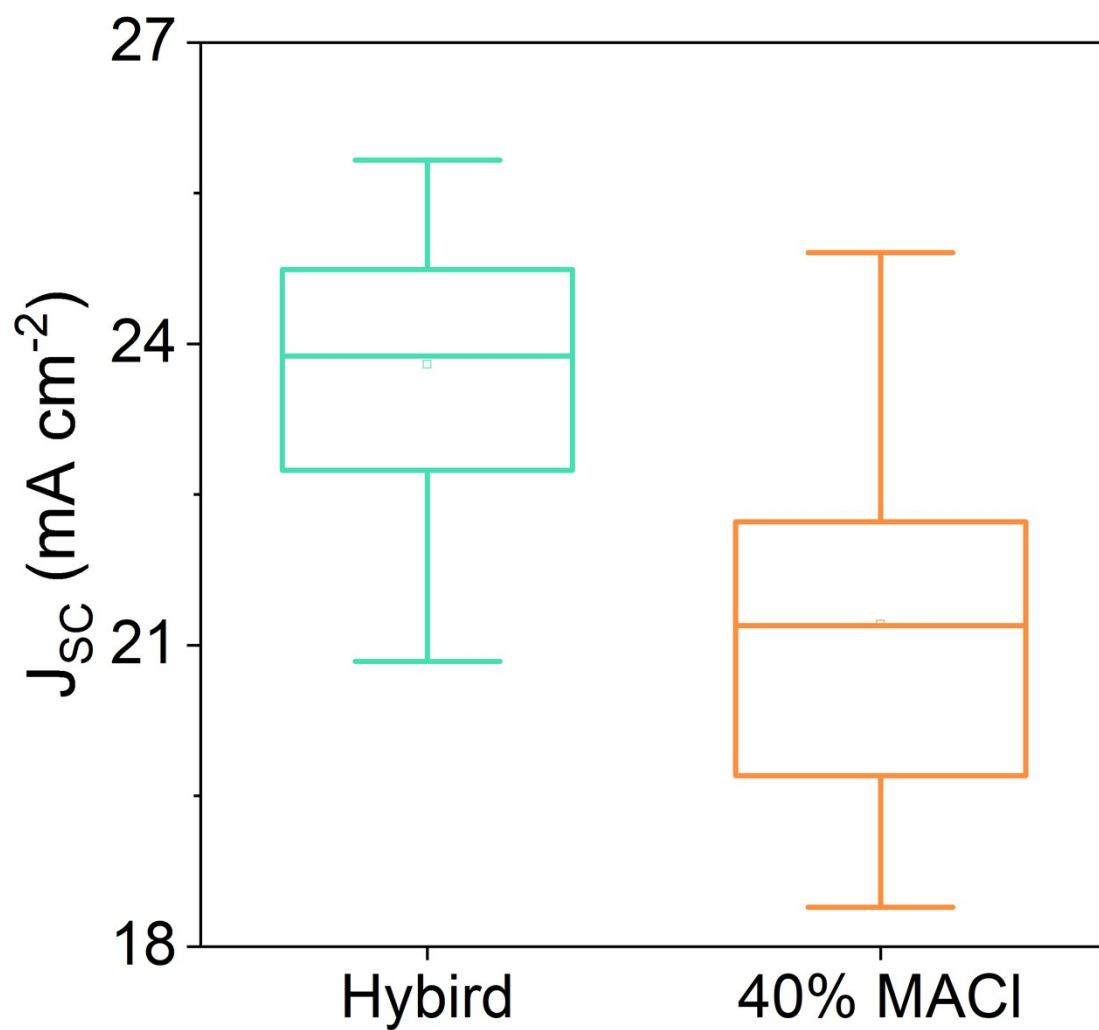

Figure S3: Distribution of short-circuit current density for Hybrid and 40 per cent MACI groups

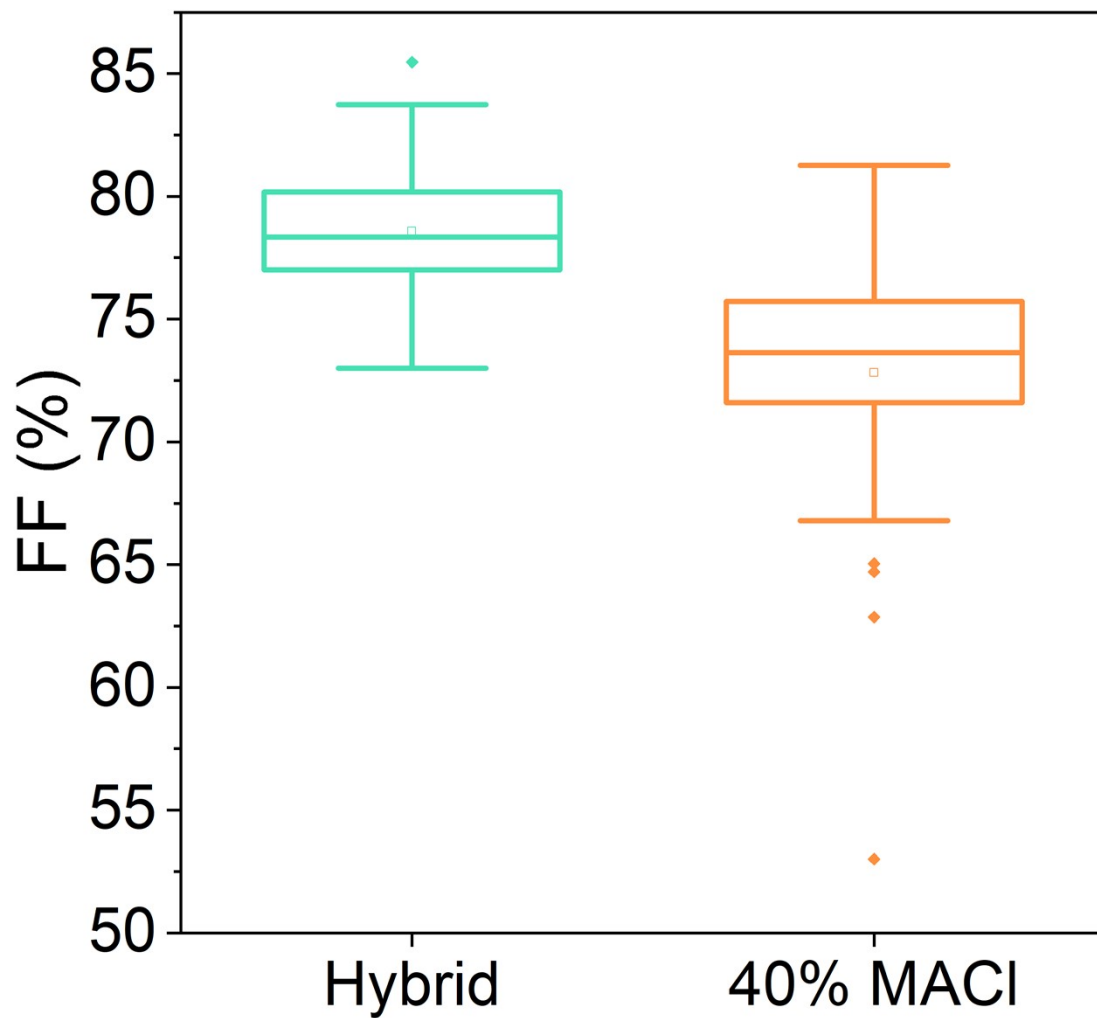

Figure S4: Distribution of fill factor in Hybrid and 40% MACI groups

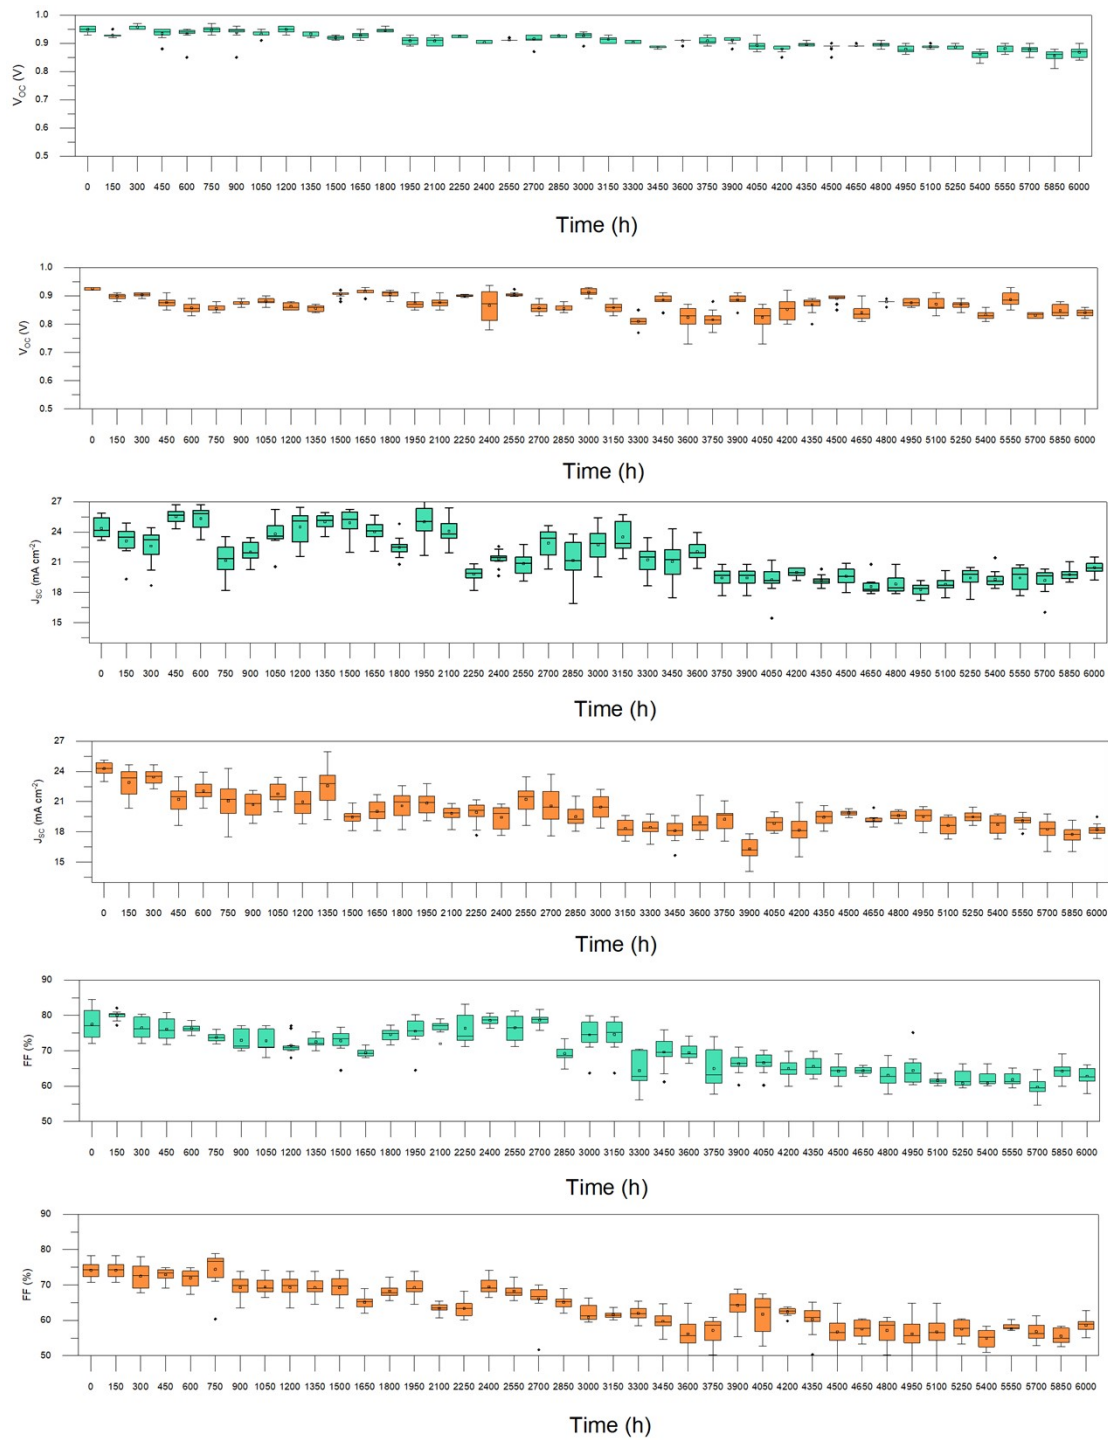

Figure S5:  $V_{oc}$ ,  $J_{sc}$ , FF for 40% MACl group (orange) and Hybrid group (cyan) during 6000h

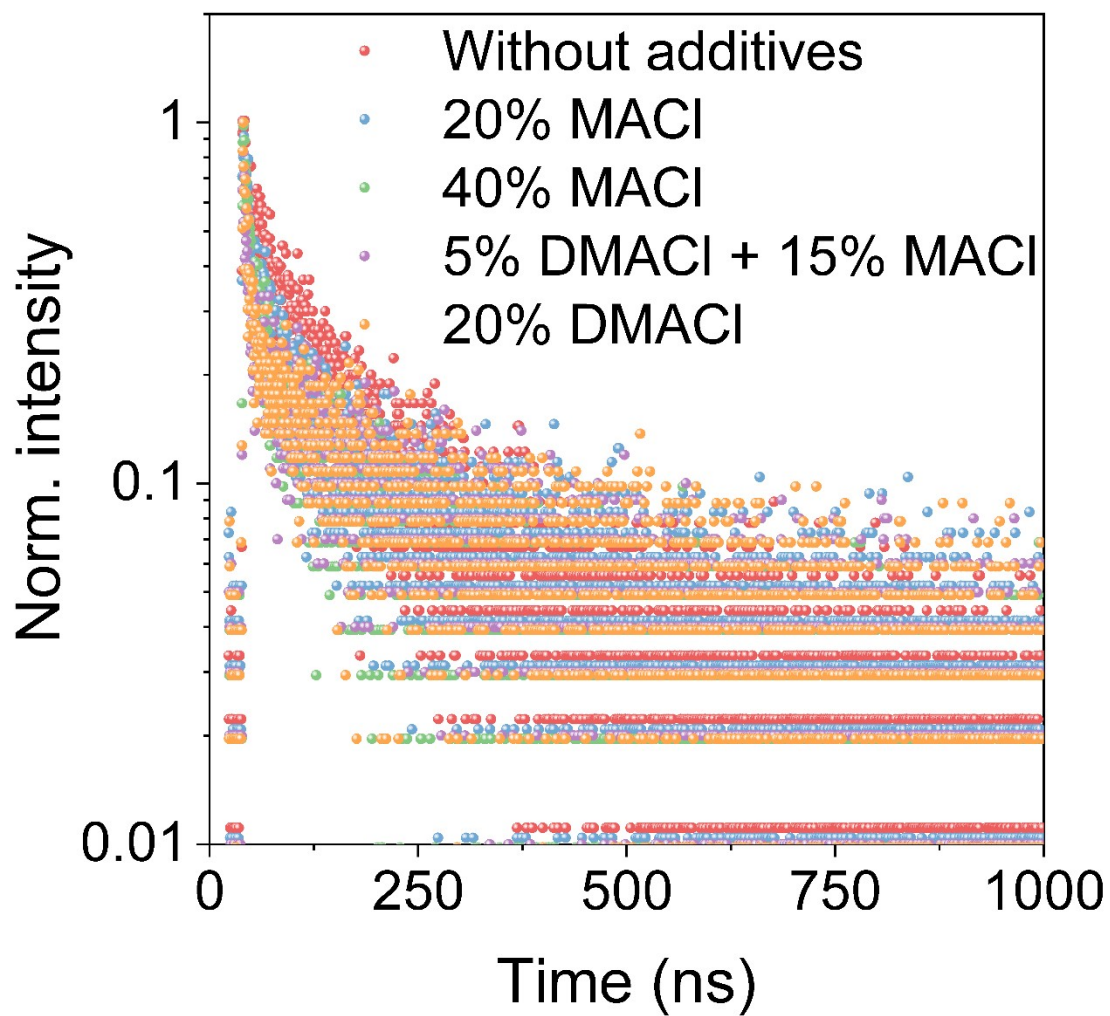

Fig S6: Time-resolved photoluminescence spectra of five perovskite precursors on  $\text{TiO}_2$  substrates



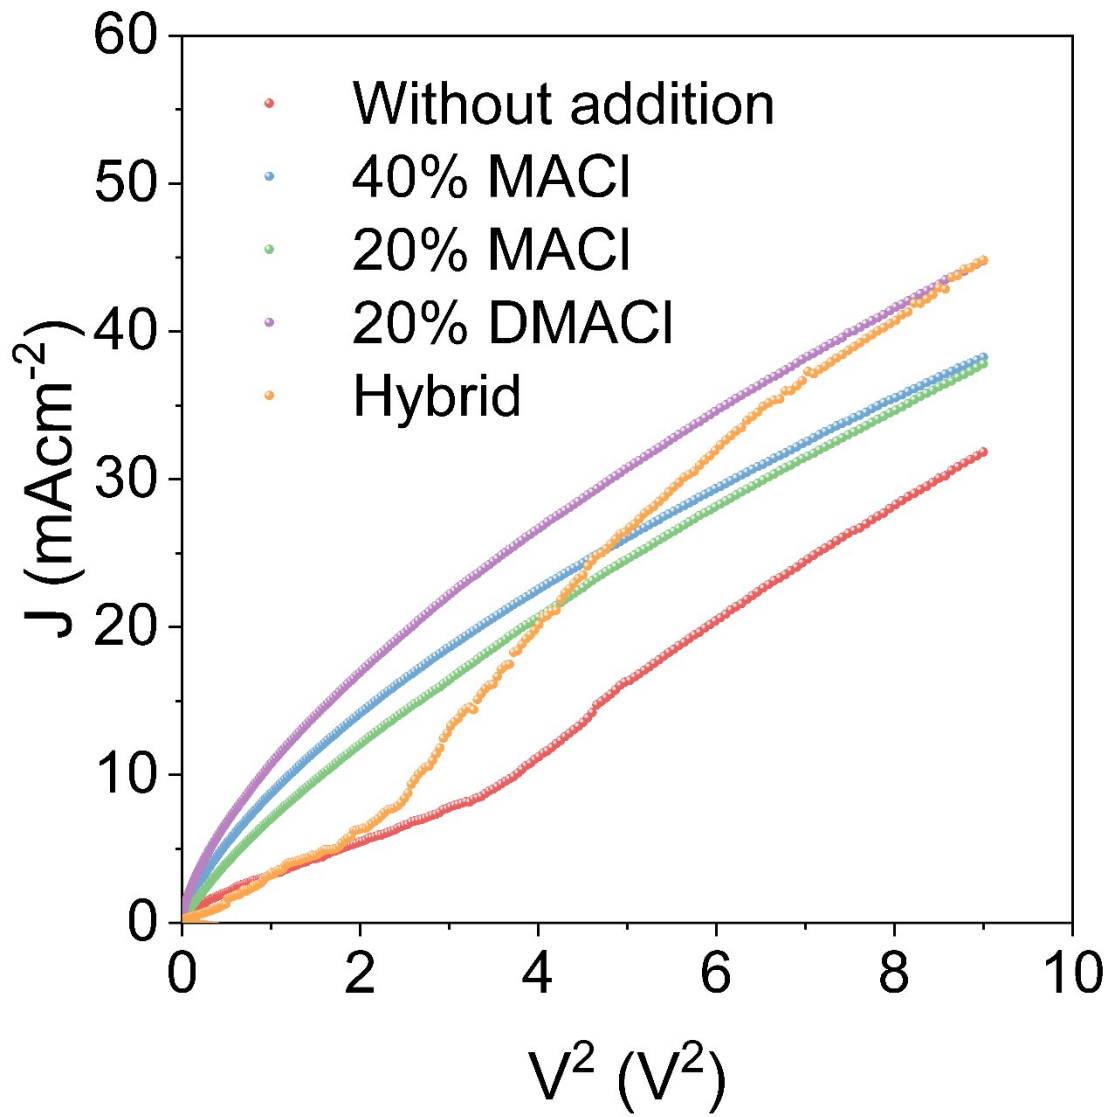

Figure S7: J-V<sup>2</sup> curves of different perovskite films
